# Supplementary material
Source: PubMed Central journal article supplement (PMC2553117)
Supplement: 108.131508_1.pdf [file 108.131508_1.pdf]

Supplementary Figure 1

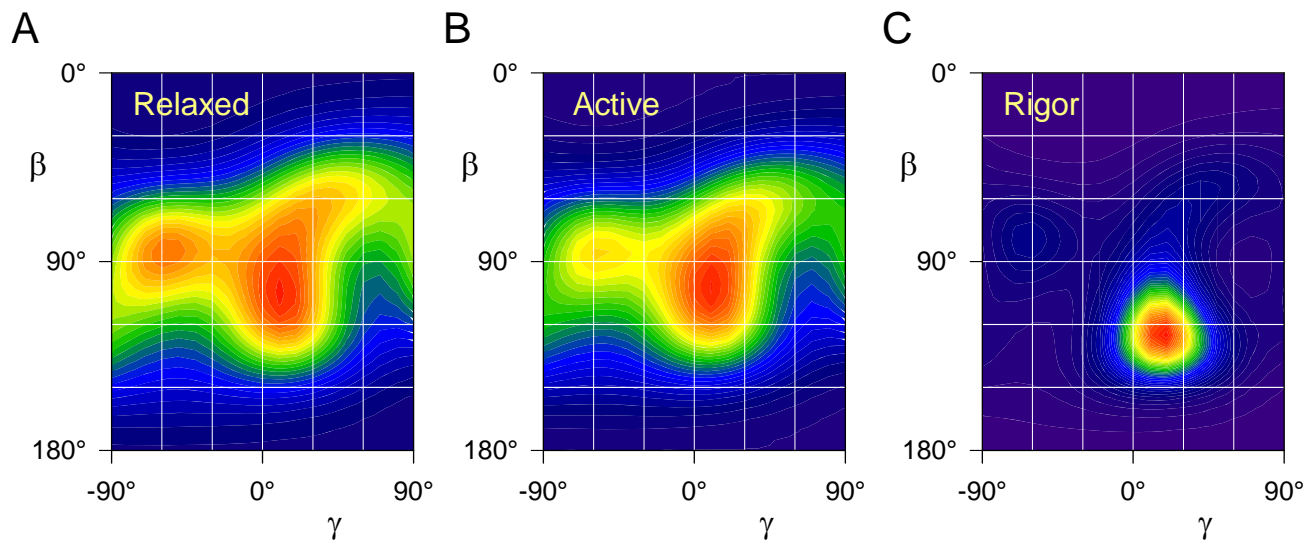

SUPPLEMENTARY FIGURE 1. Contour plots of the ME orientation distributions ( $\beta$ ,  $\gamma$ ) of the LCD in relaxation (A), active contraction (B) and rigor (C), calculated from the  $\langle P_2 \rangle$  and  $\langle P_4 \rangle$  data in Fig. 3 using the crystal structure of nucleotide-free scallop myosin.

Supplementary Figure 2

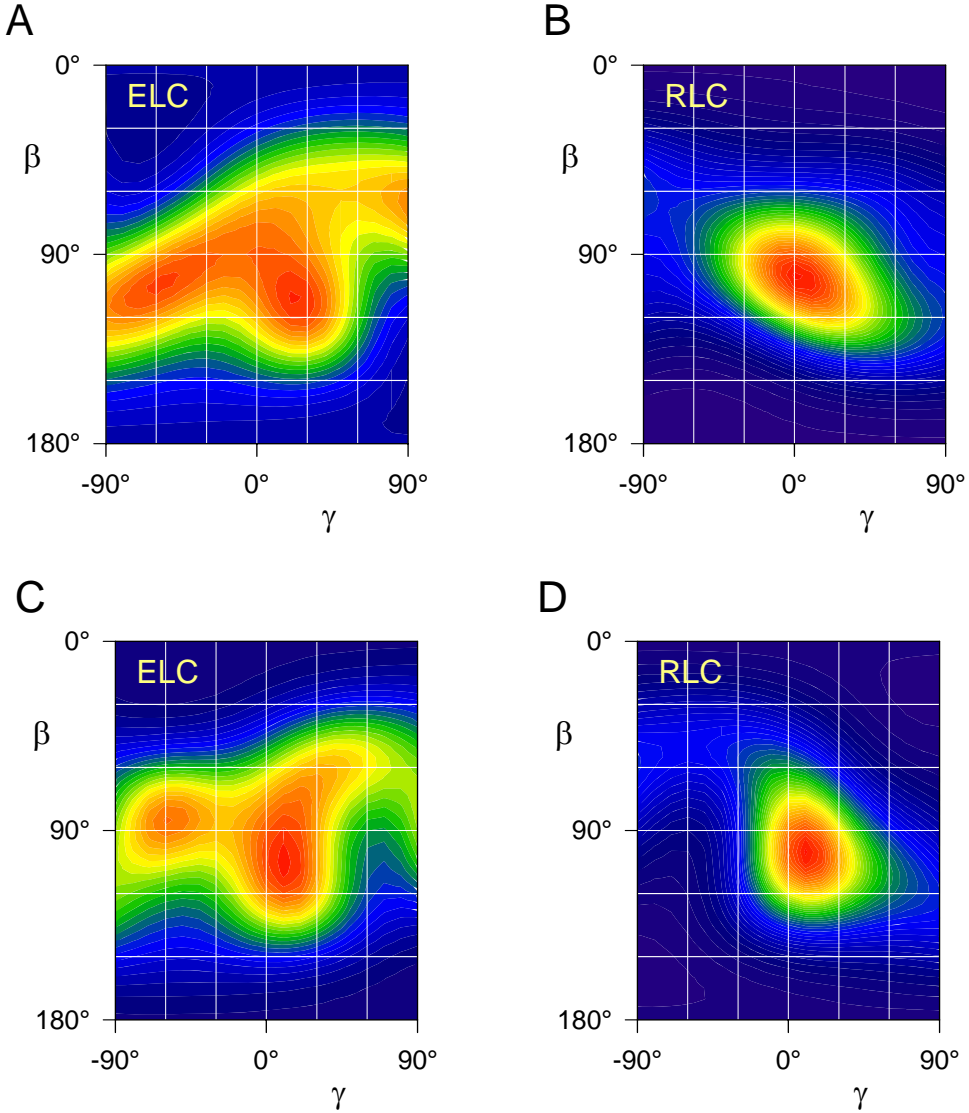

SUPPLEMENTARY FIGURE 2. ME orientation distributions of the LCD in relaxed muscle determined from probes on the ELC (A,C) and RLC (B,D) using post-rigor structures of chicken skeletal myosin (A,B) and scallop myosin (C,D).
